# Supplementary material
Source: PubMed Central journal article supplement (PMC2874884)

**a**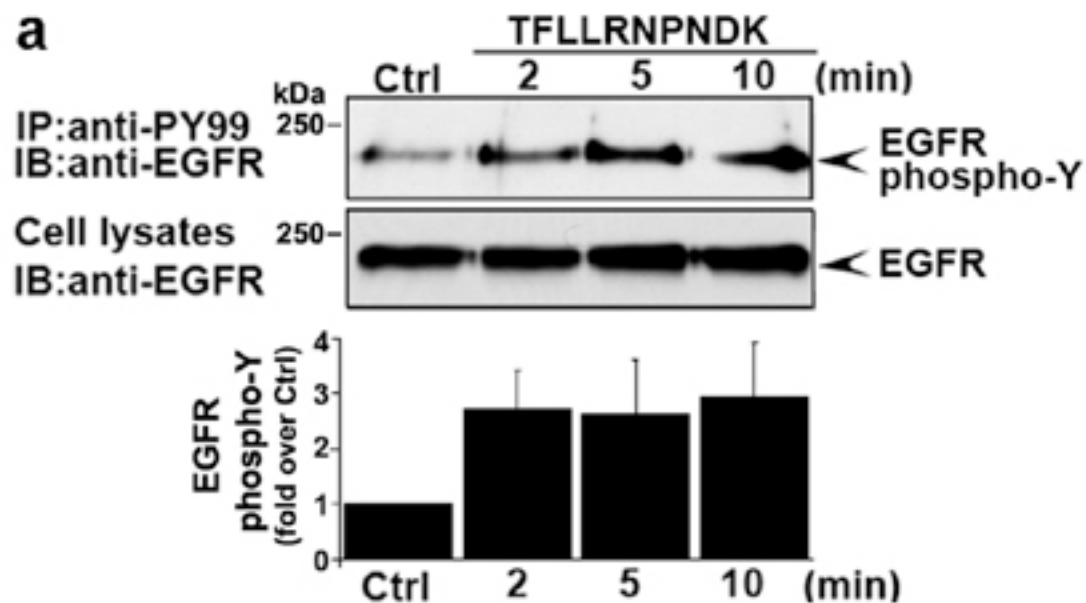**b**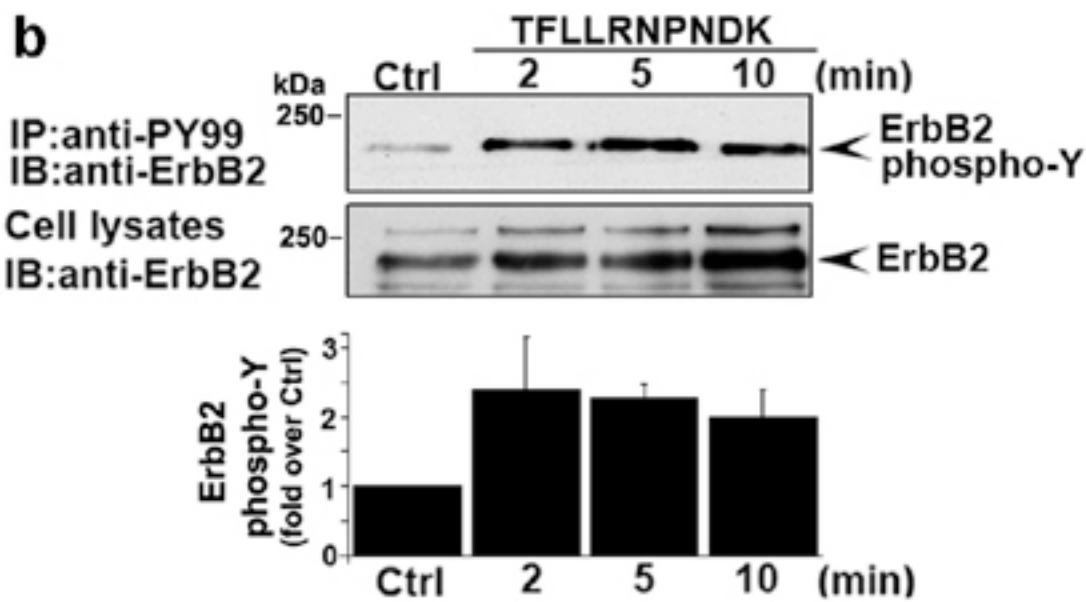

Supplement: NIHMS200734-supplement-Supplementary_Figure_S1.pdf [file NIHMS200734-supplement-Supplementary_Figure_S1.pdf]

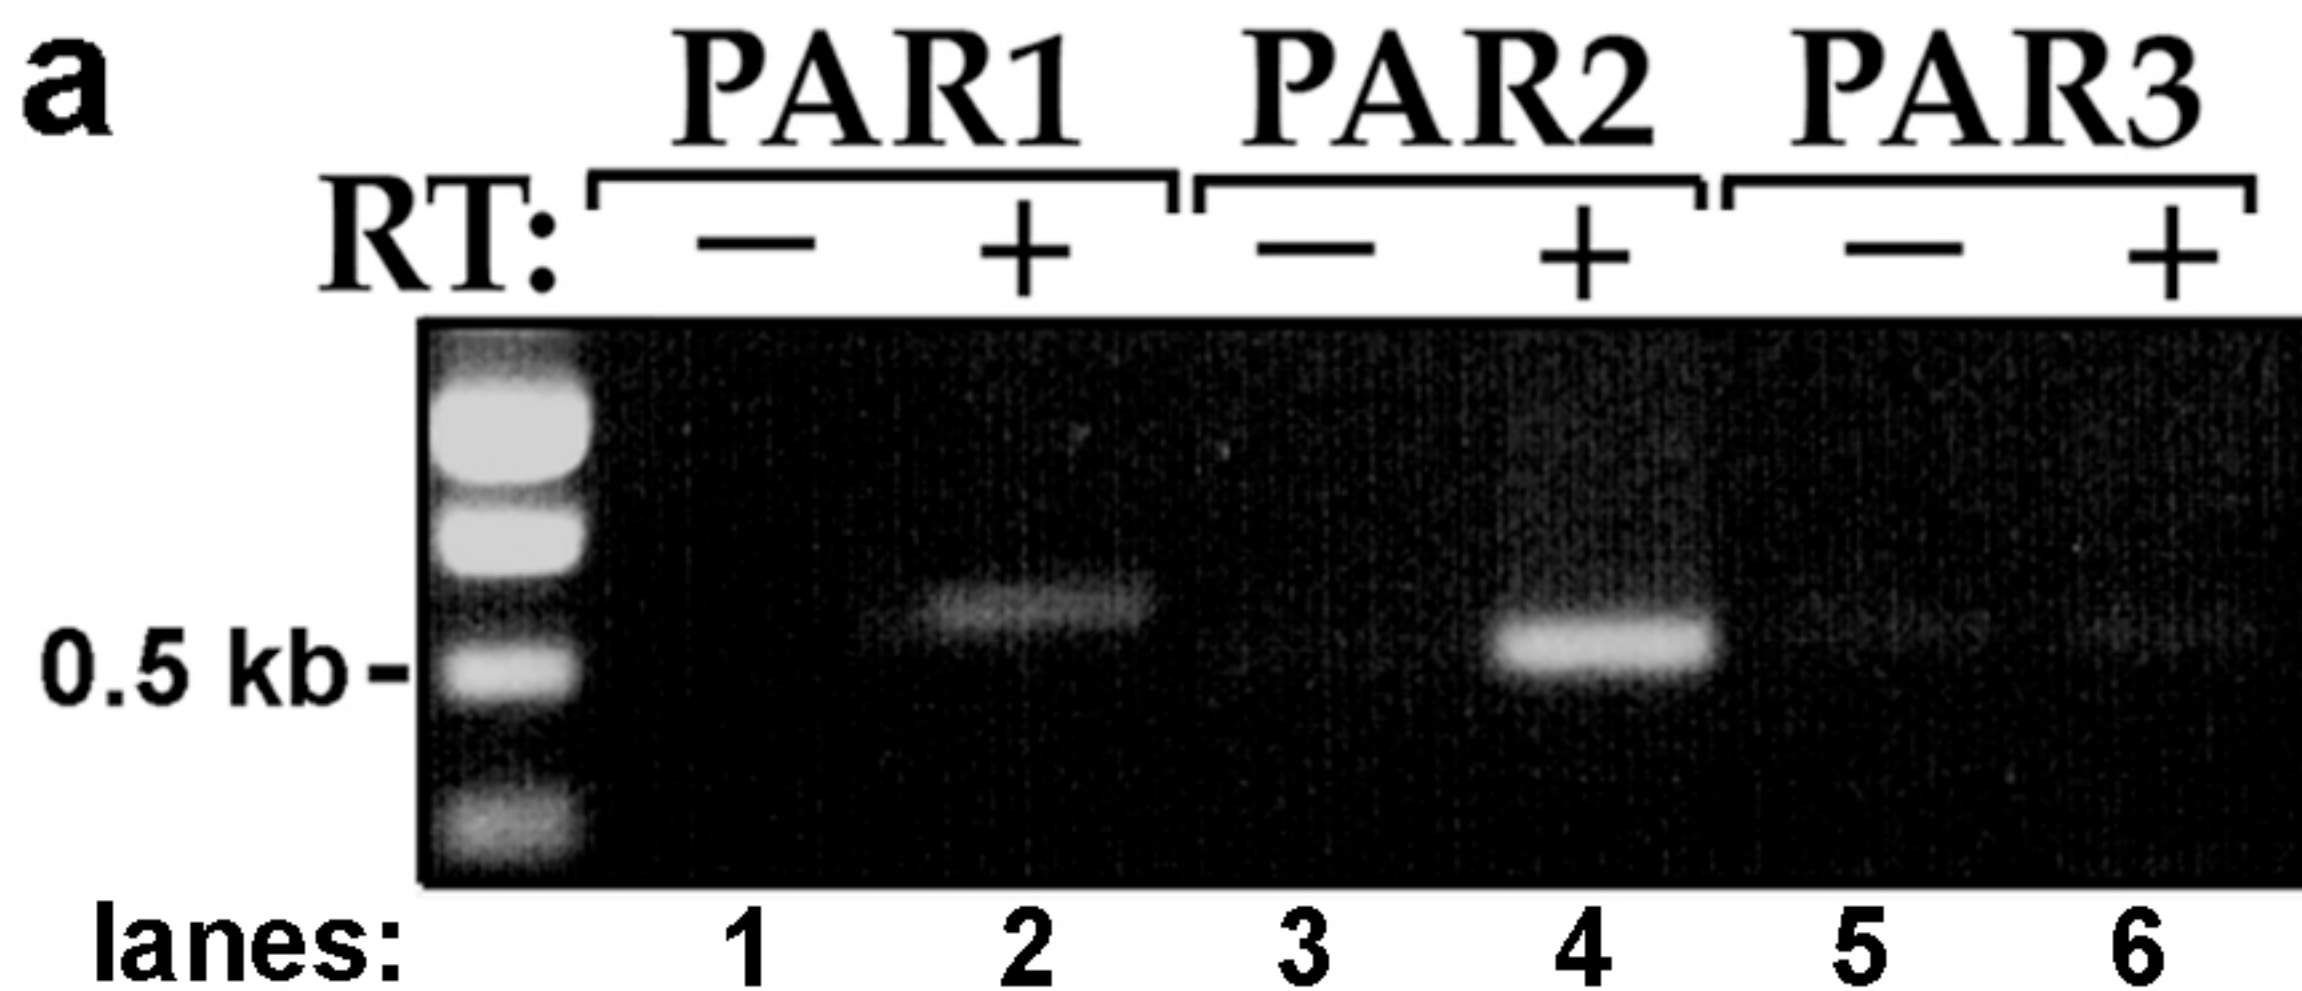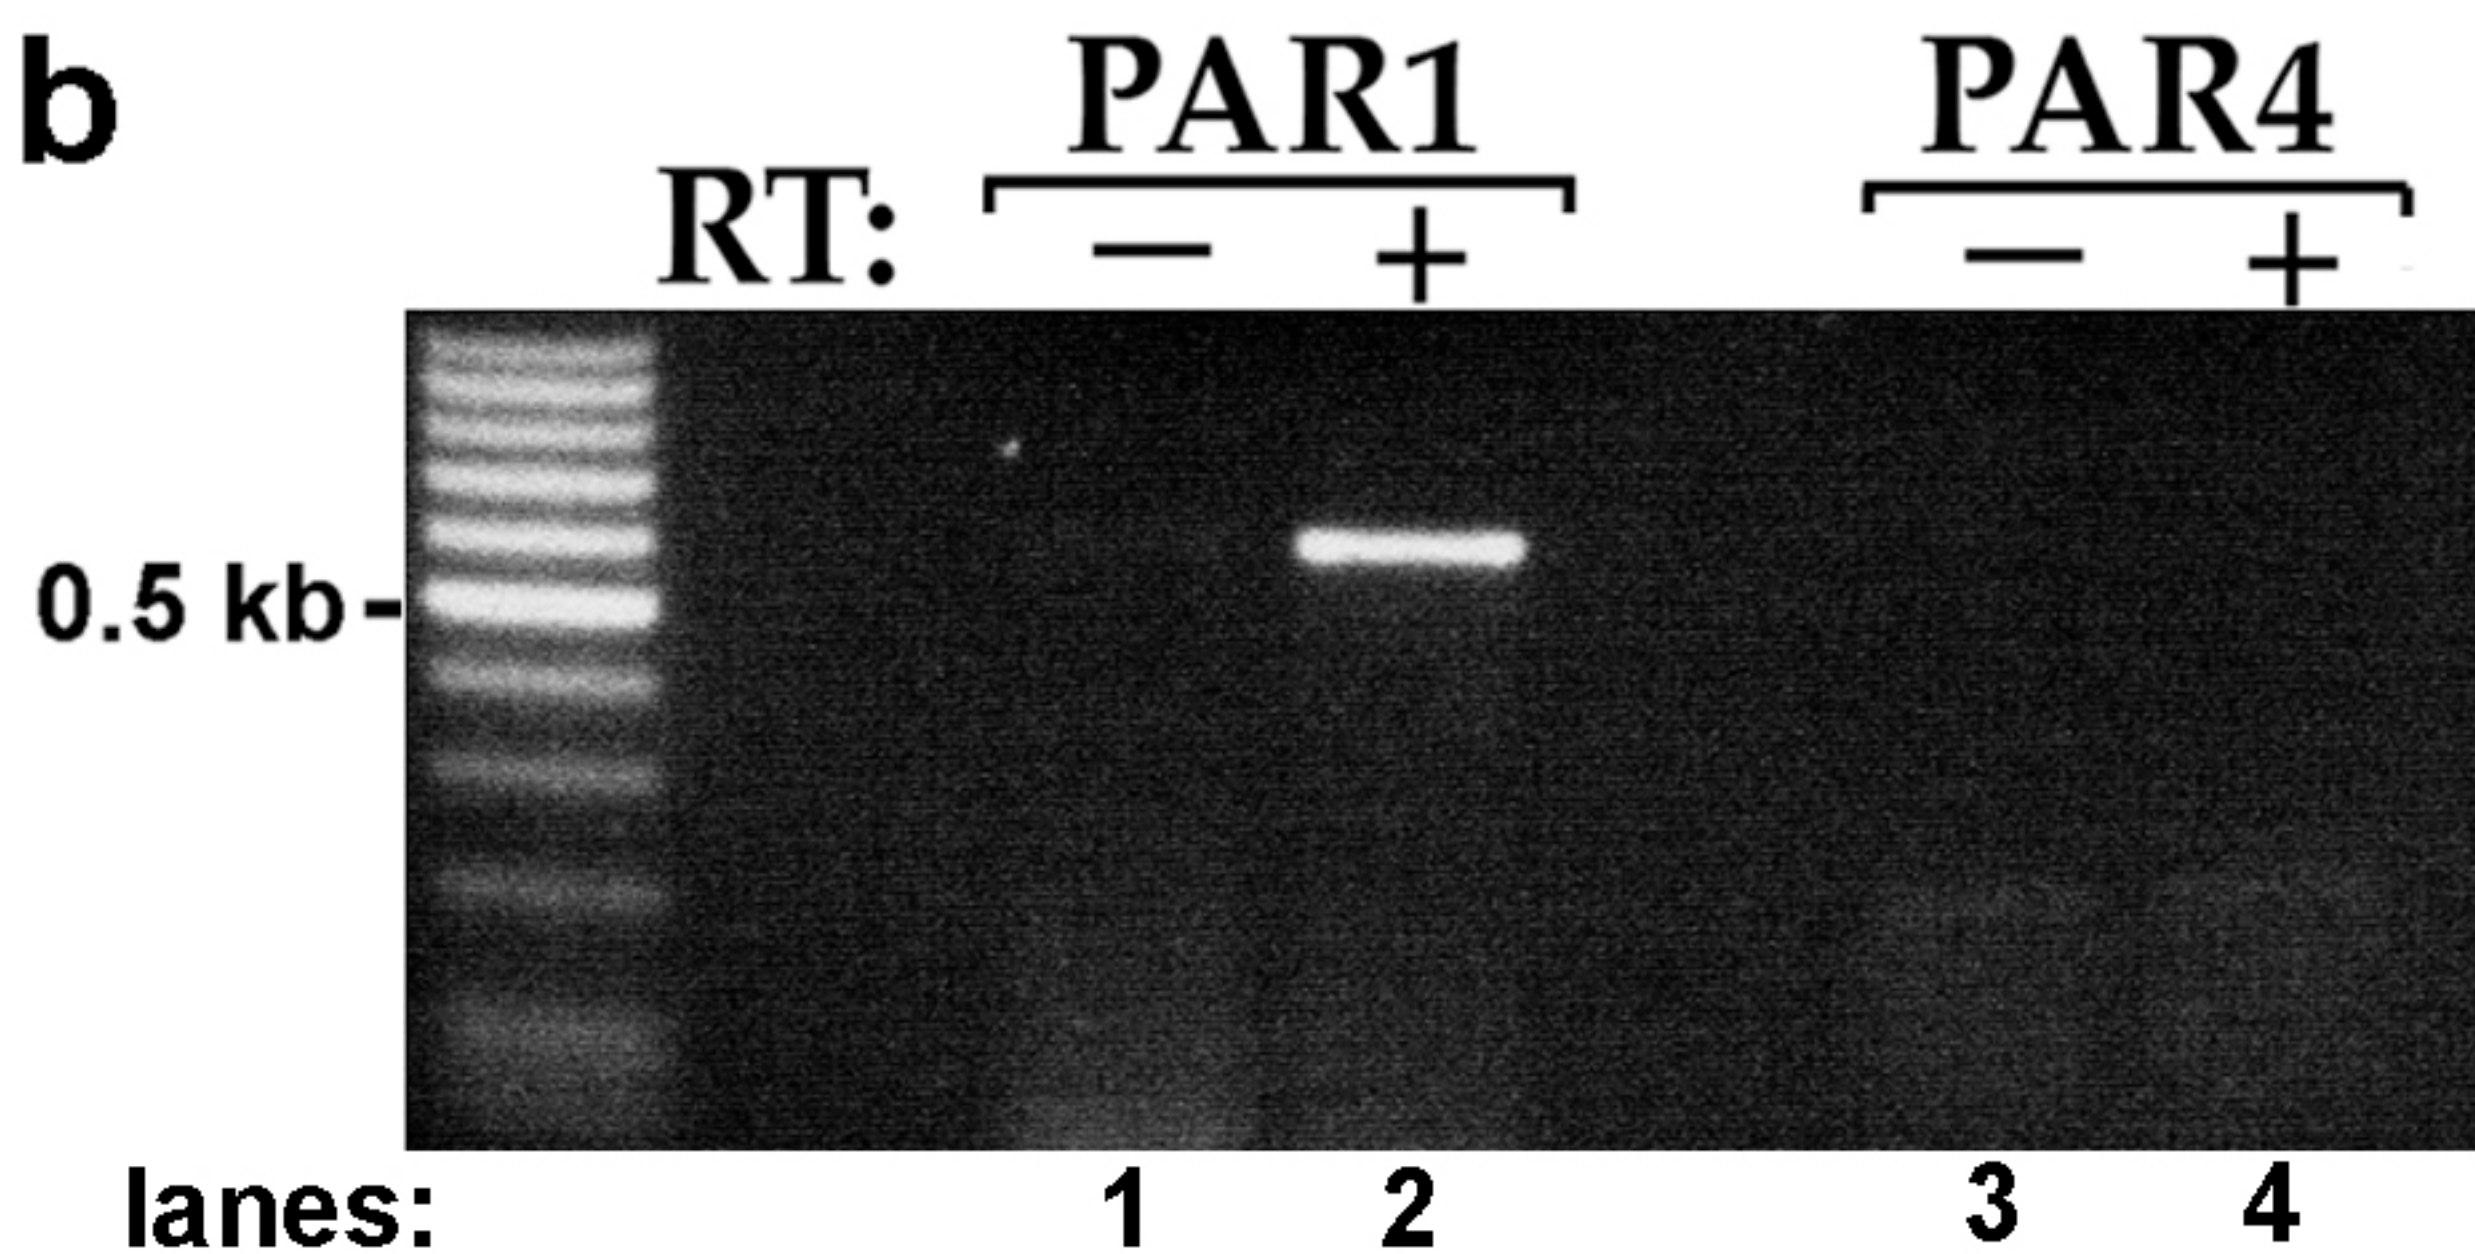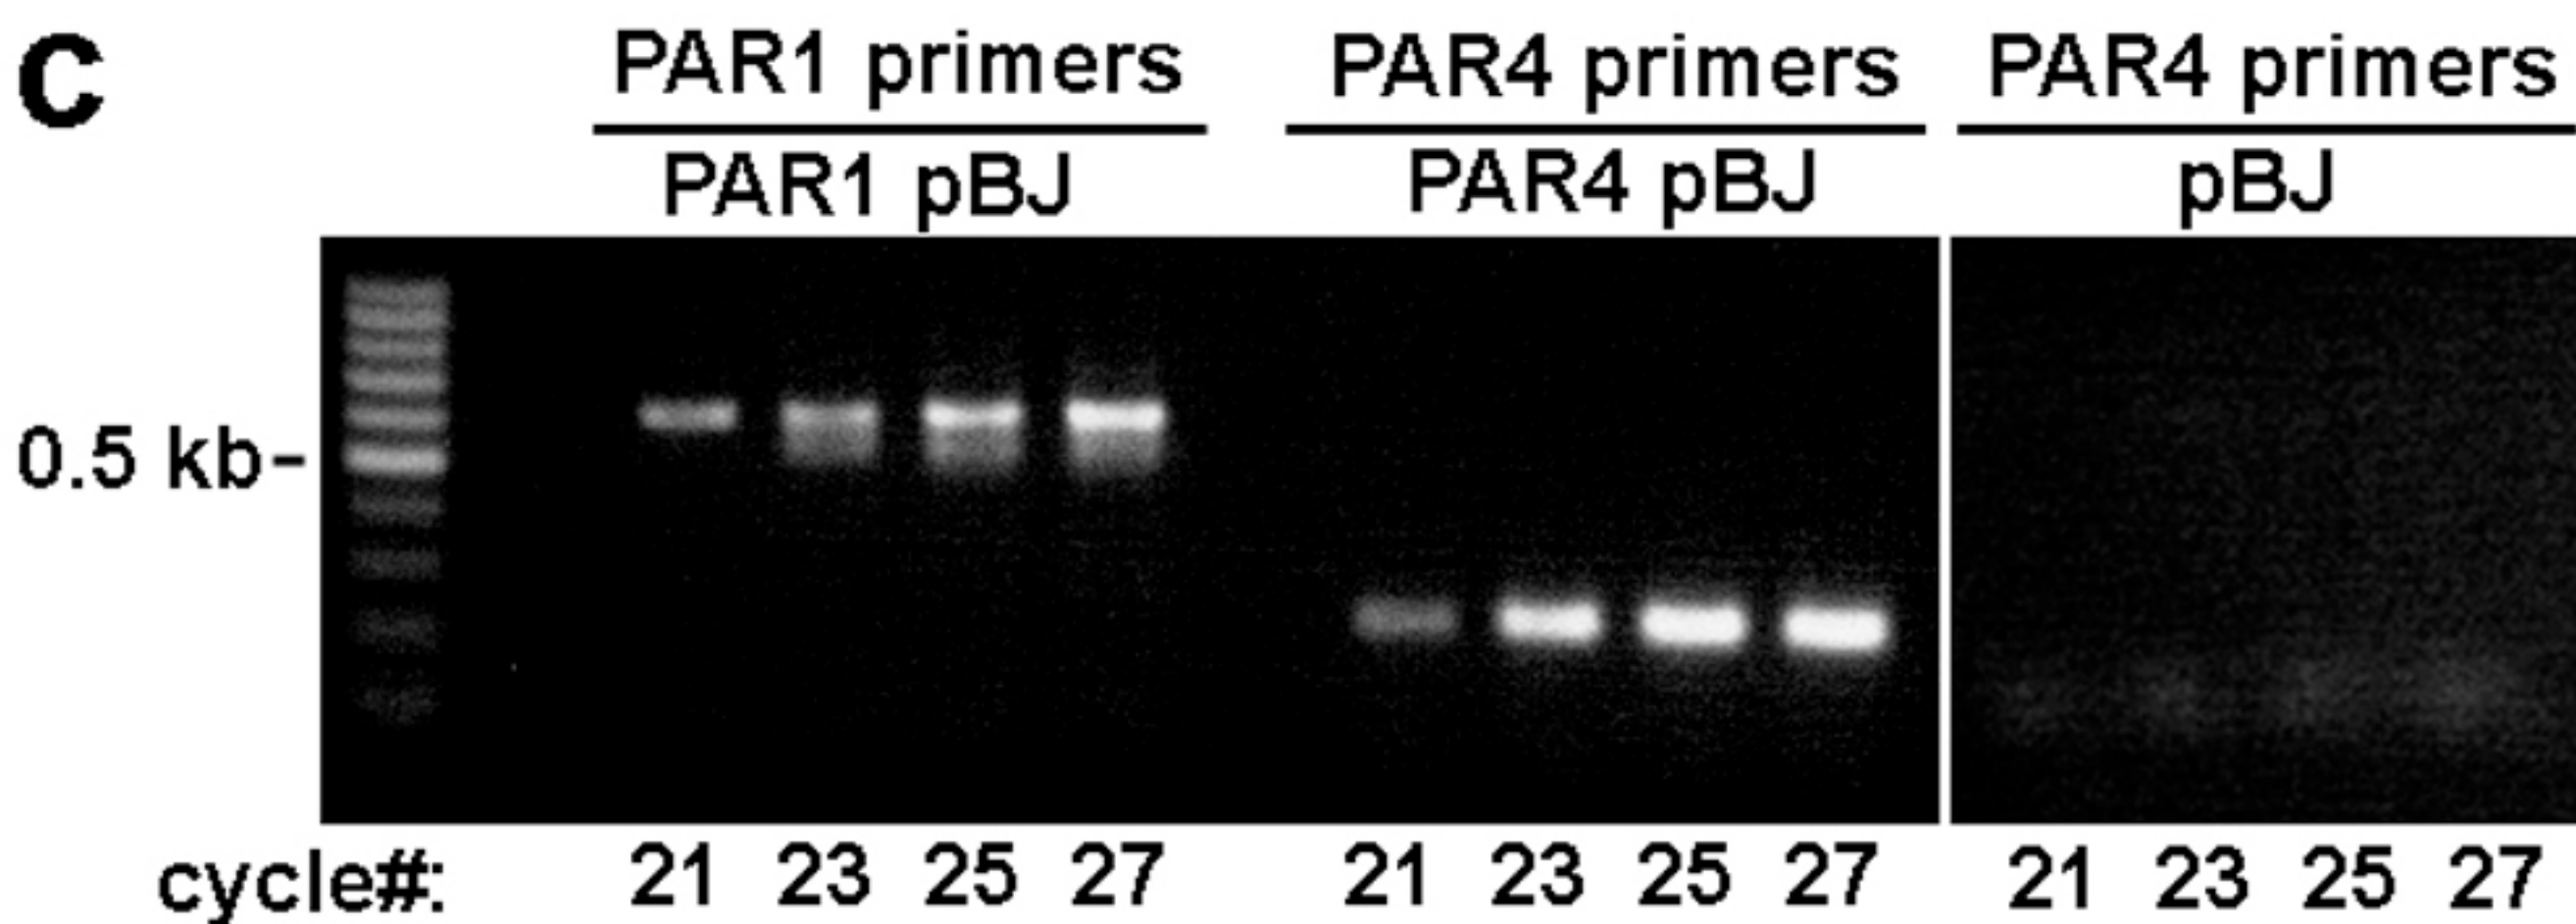

Supplement: NIHMS200734-supplement-Supplementary_Figure_S2.pdf [file NIHMS200734-supplement-Supplementary_Figure_S2.pdf]
